# Supplementary material for: Intercomparison of wind speed, temperature, and humidity data between dropsondes and aircraft in situ measurements
Source: Copernicus journal article supplement (doi:10.5194/egusphere-2024-3024), 2024-10-15
Supplement: Supplementary file 1 [file egusphere-2024-3024-supplement.pdf]

**Table S1: Summary table of all TAMMS – dropsonde wind speed (u component) intercomparison metrics. The first row uses all data points following the Fig. 1 method excluding the last step, which allows for vastly increased statistics by allowing all pairs to be used that were within 25 m vertical distance. The second row includes the final step of Fig. 1 using only the data points with minimized vertical separation (i.e., one pair per dropsonde launch). Remaining rows examine all the data from the second row but in various categories. SE = standard error; STD = standard deviation.**

|                                                  | N      | Linear (SE)/Bisector Slope (SE) | Linear/Bisector Y-Intercept | r    | Mean Error $\pm$ STD (m s <sup>-1</sup> ) |
|--------------------------------------------------|--------|---------------------------------|-----------------------------|------|-------------------------------------------|
| All: Relaxed vertical criteria                   | 369677 | 1.01 (0.00)/1.03 (0.00)         | 0.05 / -0.06                | 0.97 | 0.10 $\pm$ 1.68                           |
| All: Strict vertical criteria                    | 555    | 1.02 (0.01)/1.04 (0.01)         | 0.09/-0.02                  | 0.97 | 0.16 $\pm$ 1.62                           |
| Summer                                           | 293    | 1.01 (0.01)/1.04 (0.02)         | 0.07/0.02                   | 0.97 | 0.09 $\pm$ 1.25                           |
| Winter                                           | 262    | 1.02 (0.02)/1.05 (0.02)         | 0.11/-0.08                  | 0.97 | 0.22 $\pm$ 1.95                           |
| Cloudy                                           | 81     | 1.01 (0.03)/1.05 (0.04)         | -0.41/-0.55                 | 0.97 | -0.37 $\pm$ 1.73                          |
| Clear                                            | 465    | 1.01 (0.01)/1.04 (0.01)         | 0.18/0.08                   | 0.97 | 0.24 $\pm$ 1.57                           |
| u component $\leq$ 1.26 m s <sup>-1</sup>        | 185    | 0.97 (0.03)/1.05 (0.04)         | -0.09/0.17                  | 0.92 | -0.01 $\pm$ 1.39                          |
| 1.26 < u component $\leq$ 6.30 m s <sup>-1</sup> | 185    | 0.99 (0.08)/1.46 (0.10)         | 0.29/-2.55                  | 0.68 | 0.27 $\pm$ 1.51                           |
| u component > 6.30 m s <sup>-1</sup>             | 185    | 1.05 (0.03)/1.13 (0.04)         | -0.41/-1.34                 | 0.93 | 0.20 $\pm$ 1.89                           |
| Altitude $\leq$ 673 m                            | 185    | 0.99 (0.02)/1.02 (0.02)         | -0.01/-0.06                 | 0.98 | -0.03 $\pm$ 1.37                          |
| 673 < Altitude $\leq$ 1304 m                     | 185    | 0.99 (0.02)/1.02 (0.03)         | 0.07/-0.08                  | 0.96 | 0.01 $\pm$ 1.64                           |
| Altitude > 1304 m                                | 185    | 1.04 (0.02)/1.06 (0.02)         | 0.27/0.10                   | 0.98 | 0.49 $\pm$ 1.76                           |
| Horiz. distance $\leq$ 13616 m                   | 185    | 1.01 (0.02)/1.03 (0.02)         | 0.06/-0.02                  | 0.98 | 0.08 $\pm$ 1.33                           |
| 13616 < Horiz. dist. $\leq$ 22955 m              | 185    | 1.01 (0.02)/1.04 (0.02)         | -0.11/-0.23                 | 0.97 | -0.08 $\pm$ 1.57                          |
| Horiz. distance > 22955 m                        | 185    | 1.03 (0.02)/1.06 (0.03)         | 0.34/0.20                   | 0.97 | 0.47 $\pm$ 1.85                           |
| 5 TAMMS Pts/3 Dropsonde Pts                      | 485    | 1.00 (0.01)/0.97 (0.02)         | 0.10/0.23                   | 0.97 | 0.14 $\pm$ 1.54                           |
| 11 TAMMS Pts/3 Dropsonde Pts                     | 467    | 1.01 (0.01)/0.97 (0.02)         | 0.09/0.21                   | 0.97 | 0.13 $\pm$ 1.46                           |
| 21 TAMMS Pts/3 Dropsonde Pts                     | 448    | 1.00 (0.01)/0.98 (0.01)         | 0.06/0.17                   | 0.98 | 0.09 $\pm$ 1.40                           |

**Table S2. Same as Table S1 but for the v component of wind speed.**

|                                                   | N      | Linear (SE)/Bisector Slope (SE) | Linear/Bisector Y-Intercept | r    | Mean Error $\pm$ STD (m s <sup>-1</sup> ) |
|---------------------------------------------------|--------|---------------------------------|-----------------------------|------|-------------------------------------------|
| All: Relaxed vertical criteria                    | 369677 | 0.96 (0.00)/1.00 (0.00)         | -0.13/ -0.06                | 0.96 | -0.05 $\pm$ 1.72                          |
| All: Strict vertical criteria                     | 555    | 0.96 (0.01)/1.00 (0.02)         | -0.01/0.03                  | 0.96 | 0.03 $\pm$ 1.67                           |
| Summer                                            | 293    | 0.98 (0.02)/1.02 (0.02)         | -0.05/-0.06                 | 0.97 | -0.05 $\pm$ 1.35                          |
| Winter                                            | 262    | 0.94 (0.02)/0.99 (0.03)         | 0.01/0.10                   | 0.95 | 0.12 $\pm$ 2.00                           |
| Cloudy                                            | 81     | 0.92 (0.04)/0.97 (0.06)         | 0.06/0.27                   | 0.94 | 0.37 $\pm$ 2.09                           |
| Clear                                             | 465    | 0.97 (0.04)/1.01 (0.06)         | -0.02/-0.01                 | 0.96 | -0.01 $\pm$ 1.56                          |
| v component $\leq$ -3.42 m s <sup>-1</sup>        | 185    | 0.81 (0.04)/0.98 (0.06)         | -1.20/0.00                  | 0.83 | 0.19 $\pm$ 1.72                           |
| -3.42 < v component $\leq$ 2.20 m s <sup>-1</sup> | 185    | 1.00 (0.06)/1.32 (0.08)         | 0.13/0.31                   | 0.76 | 0.13 $\pm$ 1.43                           |
| v component > 2.20 m s <sup>-1</sup>              | 185    | 1.05 (0.05)/1.27 (0.07)         | -0.49/-2.12                 | 0.82 | -0.24 $\pm$ 1.76                          |
| Altitude $\leq$ 673 m                             | 185    | 0.97 (0.02)/1.00 (0.02)         | 0.01/0.03                   | 0.97 | 0.03 $\pm$ 1.46                           |
| 673 < Altitude $\leq$ 1304 m                      | 185    | 0.93 (0.02)/0.98 (0.03)         | 0.07/0.12                   | 0.95 | 0.15 $\pm$ 1.65                           |
| Altitude > 1304 m                                 | 185    | 0.97 (0.02)/1.02 (0.03)         | -0.11/-0.08                 | 0.95 | -0.09 $\pm$ 1.87                          |
| Horiz. distance $\leq$ 13616 m                    | 185    | 0.95 (0.02)/0.99 (0.03)         | 0.00/0.05                   | 0.96 | 0.06 $\pm$ 1.47                           |
| 13616 < Horiz. dist. $\leq$ 22955 m               | 185    | 0.96 (0.02)/1.00 (0.03)         | 0.00/0.06                   | 0.96 | 0.06 $\pm$ 1.71                           |
| Horiz. distance > 22955 m                         | 185    | 0.97 (0.02)/1.01 (0.03)         | -0.03/-0.04                 | 0.96 | -0.04 $\pm$ 1.82                          |
| 5 TAMMS Pts/3 Dropsonde Pts                       | 485    | 0.95 (0.02)/0.96 (0.03)         | 0.02/0.02                   | 0.96 | 0.05 $\pm$ 1.62                           |
| 11 TAMMS Pts/3 Dropsonde Pts                      | 467    | 0.95 (0.01)/0.96 (0.02)         | 0.01/0.01                   | 0.96 | 0.04 $\pm$ 1.59                           |
| 21 TAMMS Pts/3 Dropsonde Pts                      | 448    | 0.96 (0.01)/0.96 (0.02)         | 0.00/0.00                   | 0.96 | 0.03 $\pm$ 1.59                           |
